# Supplementary material for: Calidad de vida, educación física y salud
Source: Royal Society of Chemistry journal article supplement (doi:10.1039/c2mb25423a), 2006-09-30

## Supplementary material to Ewald et al.

Table S1: List of targeted genes

Table S2: Quantitative metabolomics: analytical platforms and internal standards

Table S3: Specific growth rates of mutants on glucose, galactose, and ethanol

Table S4: Definition of mass action ratios

Table S5: Adenylate energy charge

Table S6: Growth and metabolic phenotype for isoenzyme knockouts

Figure S1: Metabolic network of central carbon metabolism in *S. cerevisiae*.

Figure S2: Correlation of growth rate and metabolite concentrations

Figure S3: Correlation between metabolite concentrations and metabolic fluxes

Figure S4: Unsupervised multivariate analysis of metabolome data

Figure S5: Analysis of changes in chemical equilibrium in enzymatic mutants.

Figure S6: Metabolome response to pentose-phosphate pathway transaldolase deletion

**Table S1 – List of genes included in this study**

All *S. cerevisiae* deletions were introduced into a prototrophic CEN.PK background strain by replacement with the kanMX4 or the natNT2 cassette <sup>a</sup>by Blank et al.<sup>1</sup> or <sup>b</sup>in this study. <sup>c</sup>not included in original screen

| mutant                          | alias                       | ORF       |
|---------------------------------|-----------------------------|-----------|
| WT                              | CEN.PK 113-7D haploid mat α |           |
| <i>ADH1<sup>a</sup></i>         | <i>ADC1</i>                 | YOL086C   |
| <i>ADH3<sup>a</sup></i>         | -                           | YMR083W   |
| <i>ALD5<sup>a</sup></i>         | -                           | YER073W   |
| <i>ALD6<sup>a</sup></i>         | <i>ALD1</i>                 | YPL061W   |
| <i>COX5a<sup>a</sup></i>        | -                           | YNL052W   |
| <i>CTP1<sup>a</sup></i>         | -                           | YBR291C   |
| <i>DAL7<sup>a</sup></i>         | <i>MLS2, MSL2</i>           | YIR031C   |
| <i>FUM1<sup>a</sup></i>         | -                           | YPL262W   |
| <i>GCV2<sup>a</sup></i>         | <i>GSD2</i>                 | YMR189W   |
| <i>GLY1<sup>a</sup></i>         | -                           | YEL046C   |
| <i>GND2<sup>a</sup></i>         | -                           | YGR256W   |
| <i>ICL1<sup>a</sup></i>         | -                           | YER065C   |
| <i>IDP1<sup>a</sup></i>         | -                           | YDL066W   |
| <i>IDP2<sup>a</sup></i>         | -                           | YLR174W   |
| <i>LSC1<sup>a</sup></i>         | -                           | YOR142W   |
| <i>MAE1<sup>a</sup></i>         | -                           | YKL029C   |
| <i>MDH1<sup>a</sup></i>         | -                           | YKL085W   |
| <i>MDH2<sup>a</sup></i>         | -                           | YOL126C   |
| <i>MDH3<sup>a</sup></i>         | -                           | YDL078C   |
| <i>MLS1<sup>a</sup></i>         | -                           | YNL117W   |
| <i>NQM1<sup>a</sup></i>         | -                           | YGR043C   |
| <i>OAC1<sup>a</sup></i>         | -                           | YKL120W   |
| <i>PCK1<sup>a</sup></i>         | <i>JPM2, PPC2</i>           | YKR097W   |
| <i>PGM1<sup>a</sup></i>         | -                           | YKL127W   |
| <i>PGM2<sup>a</sup></i>         | <i>GAL5</i>                 | YMR105C   |
| <i>SDH1<sup>a</sup></i>         | -                           | YKL148C   |
| <i>SER33<sup>a</sup></i>        | -                           | YIL074C   |
| <i>SFC1<sup>a</sup></i>         | <i>ACR1</i>                 | YJR095W   |
| <i>SOL1<sup>a</sup></i>         | -                           | YNR034W   |
| <i>SOL2<sup>a</sup></i>         | -                           | YCR073W-A |
| <i>SOL3<sup>a</sup></i>         | -                           | YHR163W   |
| <i>SOL4<sup>a</sup></i>         | -                           | YGR248W   |
| <i>TAL1<sup>a</sup></i>         | -                           | YLR354C   |
| <i>TAL1, NQM1<sup>b,c</sup></i> |                             |           |
| <i>TKL1<sup>b</sup></i>         | -                           | YPR074C   |

Reference:  
Blank, L.M., Küpfer, L. & Sauer, U. Large-scale <sup>13</sup>C-flux analysis reveals mechanistic principles of metabolic network robustness to null mutations in yeast. *Genome Biol* **6**, R49 (2005)

**Table S2 - Quantitative metabolomics: analytical platforms and internal standards**

Two different platforms were used for metabolite measurements, GC-TOF and LC-MS/MS (as described in Materials and Methods). Listed are the name as used in the main text and figures, the full name and the Pubchem/CHEBI ID. As internal standards for quantification, we used labeled biomass (13Cbm) for the LC and norvaline (nval) or glutarate (glut) for the GC, respectively, as indicated in column 5. \* >90 % 3 PG in samples

| name                            | full name                  | Pubchem ID  | platform | internal standard |
|---------------------------------|----------------------------|-------------|----------|-------------------|
| <b>BPG</b>                      | bisphosphoglycerate        | 61+683      | LC-MS/MS | 13Cbm             |
| <b>2PG+3PG*</b>                 | 3-phosphoglycerate         | 59 + 439183 | LC-MS/MS | 13Cbm             |
| <b>6PG</b>                      | 6-phosphogluconolactone    | 91493       | LC-MS/MS | 13Cbm             |
| <b>ADP</b>                      | adenosine-diphosphate      | 6022        | LC-MS/MS | 13Cbm             |
| <b>a-ketoglutarate/<br/>αKG</b> | alpha-ketoglutarate        | 51          | GC       | glut              |
| <b>alanine</b>                  |                            | 5950        | GC       | nval              |
| <b>AMP</b>                      | adenosine-monophosphate    | 6083        | LC       | 13Cbm             |
| <b>arginine</b>                 |                            | 232         | LC       | 13Cbm             |
| <b>asparagine</b>               |                            | 236         | GC       | nval              |
| <b>aspartate</b>                |                            | 424         | GC       | nval              |
| <b>ATP</b>                      | adenosine-triphosphate     | 5957        | LC       | 13Cbm             |
| <b>citrate</b>                  |                            | 311         | GC       | glut              |
| <b>DHAP</b>                     | dihydroxyacetone-phosphate | 4643300     | LC       | 13Cbm             |
| <b>disaccharides</b>            | trehalose + maltose        | 1143+6255   | LC       | 13Cbm             |
| <b>E4P</b>                      | erythrose-4-phosphate      | 122357      | LC       | 13Cbm             |
| <b>F1P</b>                      | fructose-1-phosphate       | 65246       | LC       | 13Cbm             |
| <b>F6P+G1P</b>                  | fructose-6-phosphate       | 69507+65533 | LC       | 13Cbm             |
|                                 | glucose-1-phosphate        |             |          |                   |

| name                 | full name                                         | Pubchem ID | platform | internal standard |
|----------------------|---------------------------------------------------|------------|----------|-------------------|
| <b>fumarate</b>      |                                                   | 723        | GC       | Glut              |
| <b>G6P</b>           | glucose-6-phosphate                               | 99058      | LC       | 13Cbm             |
| <b>glutamate</b>     |                                                   | 611        | GC       | nval              |
| <b>glutamine</b>     |                                                   | 738        | GC       | nval              |
| <b>glycine</b>       |                                                   | 752        | GC       | nval              |
| <b>GTP</b>           | guanosine-triphosphate                            | 762        | LC       | 13Cbm             |
| <b>homoserine</b>    |                                                   | 12647      | GC       | nval              |
| <b>isocitrate</b>    |                                                   | 1198       | GC       | glut              |
| <b>isoleucine</b>    |                                                   | 6306       | GC       | nval              |
| <b>leucine</b>       |                                                   | 6106       | GC       | nval              |
| <b>lysine</b>        |                                                   | 5962       | GC       | nval              |
| <b>malate</b>        |                                                   | 525        | GC       | glut              |
| <b>methionine</b>    |                                                   | 6137       | GC       | nval              |
| <b>NAD</b>           | nicotineamidedinucleotide,<br>oxidized            | 925        | LC       | 13Cbm             |
| <b>NADH</b>          | nicotineamididinucleotide,<br>reduced             | 928        | LC       | 13Cbm             |
| <b>NADP</b>          | nicotineamididinucleotide-<br>phosphate, oxidized | 4412       | LC       | 13Cbm             |
| <b>ornithine</b>     |                                                   | 6262       | GC       | nval              |
| <b>PEP</b>           | phospho-enolpyruvate                              | 1005       | LC       | 13Cbm             |
| <b>phenylalanine</b> |                                                   | 994        | GC       | nval              |
| <b>proline</b>       |                                                   | 145742     | GC       | nval              |
| <b>R1P</b>           | ribose-1-phosphate                                | 439236     | LC       | 13Cbm             |
| <b>R5P</b>           | ribose-5-phosphate                                | 77982      | LC       | 13Cbm             |

| name               | full name                          | Pubchem ID | platform | internal standard |
|--------------------|------------------------------------|------------|----------|-------------------|
| <b>Ru5P+Xu5P</b>   | ribulose- and xylulose-5-phosphate | 850        | LC       | 13Cbm             |
| <b>S7P</b>         | seduheptulose-7-phosphate          | 165007     | LC       | 13Cbm             |
| <b>serine</b>      |                                    | 5951       | GC       | nval              |
| <b>shikimate</b>   |                                    | 1094       | LC       | 13Cbm             |
| <b>succinate</b>   |                                    | 1110       | GC       | glut              |
| <b>threonine</b>   |                                    | 6288       | GC       | nval              |
| <b>tryptophane</b> |                                    | 1148       | GC       | nval              |
| <b>tyrosine</b>    |                                    | 1153       | GC       | nval              |
| <b>valine</b>      |                                    | 6287       | GC       | nval              |

**Table S3 - Growth rates of 33 *S. cerevisiae* mutants on three different carbon substrates.**

Growth rates are given as ratios to the wild type (WT) growth rate on the same substrate. n=4, standard deviations were generally below 10 %. The specific growth rate of the wild type on glucose, galactose, and ethanol was 0.38, 0.12, and 0.15 h<sup>-1</sup>, respectively. NG = no detectable growth in liquid media within 48 h. \*growth in these mutants was so severely reduced (< 0.01 h<sup>-1</sup>) that a precise measurement was not possible. These were omitted from metabolome analysis because of the impossibility to produce sufficient biomass.

| mutant | Relative growth rate |           |         |
|--------|----------------------|-----------|---------|
|        | glucose              | galactose | ethanol |
| WT     | 1.00                 | 1.00      | 1.00    |
| SOL4   | 1.02                 | 1.04      | 1.03    |
| CTP1   | 1.00                 | 1.03      | 0.98    |
| LSC1   | 1.00                 | 1.09      | 0.90    |
| MAE1   | 1.00                 | 1.15      | 0.68    |
| SDH1   | 0.99                 | <0.1*     | NG      |
| MDH2   | 0.99                 | 1.03      | NG      |
| PGM2   | 0.99                 | 0.32      | 0.94    |
| SER33  | 0.97                 | 0.87      | 0.99    |
| GND2   | 0.97                 | 1.01      | 0.96    |
| IDP1   | 0.96                 | 0.88      | 0.91    |
| ALD5   | 0.96                 | 0.95      | 0.96    |
| SOL2   | 0.95                 | 1.07      | 0.93    |
| DAL7   | 0.95                 | 0.92      | 0.97    |
| SOL1   | 0.94                 | 0.99      | 0.97    |
| MLS1   | 0.94                 | 1.01      | NG      |
| PCK1   | 0.94                 | 0.99      | NG      |
| NQM1   | 0.93                 | 1.00      | 0.97    |
| GCV2   | 0.92                 | 0.99      | NG      |
| IDP2   | 0.92                 | 1.10      | 0.79    |
| MDH3   | 0.91                 | 0.99      | 0.85    |
| ICL1   | 0.91                 | 1.07      | NG      |
| ADH3   | 0.91                 | 0.96      | 0.97    |
| GLY1   | 0.90                 | 0.97      | 0.91    |
| SFC1   | 0.87                 | 0.93      | NG      |
| MDH1   | 0.86                 | 1.08      | NG      |
| TAL1   | 0.86                 | 1.05      | 0.97    |
| PGM1   | 0.84                 | NG        | 1.00    |
| ALD6   | 0.78                 | 0.99      | 0.64    |
| OAC1   | 0.75                 | 1.09      | 0.88    |
| SOL3   | 0.66                 | 1.00      | 0.97    |
| COX5a  | 0.62                 | <0.1*     | NG      |
| FUM1   | 0.47                 | NG        | NG      |
| ADH1   | 0.47                 | 0.95      | 0.94    |
| TKL1   | NG                   | NG        | NG      |

**Table S4 – Mass action ratios**

To systematically check for shift in chemical equilibrium around enzymes, we calculated pseudo mass action ratios for reactions in primary metabolism according to the stoichiometry defined below. Reactions were lumped if intermediates could not be measured. Cofactors were omitted from the analysis because of their homeostatic behavior.

| name  | enzymes involved                                       | assumed stoichiometry                        |
|-------|--------------------------------------------------------|----------------------------------------------|
| PGI   | Pgi1                                                   | $[F6P+G1P]/[G6P]$                            |
| PGM   | Pgm1/Pgm2                                              | $[G6P]/[F6P+G1P]$                            |
| PFK   | Pfk1/Pfk2                                              | $[FBP]/[G6P]$                                |
| FBA   | Fba1+Tpi1                                              | $[DHAP]*[DHAP]/[FBP]$                        |
| TDH   | Tpi1+Tdh1/Tdh2/Tdh3                                    | $[BPG]/[DHAP]$                               |
| PGK   | Pgk1                                                   | $[3PG]/[BPG]$                                |
| ENO   | Gpm1/Gpm2+Eno1/Eno2                                    | $[PEP]/[3PG]$                                |
| TCAin | Pyk1/Pyk2+Pda1/Pdb1+Cit1/Cit2/ Cit3<br>+Mdh1/Mdh2/Mdh3 | $[citrate]/[PEP]*[malate]$                   |
| ACO   | Aco1/Aco2                                              | $[isocitrate]/[citrate]$                     |
| IDH   | Idh1/Idh2                                              | $[\alpha\text{-ketoglutarate}]/[isocitrate]$ |
| LSC   | Kgd1+Kgd2+Lsc1/Lsc2                                    | $[succinate]/[\alpha\text{-ketoglutarate}]$  |
| SDH   | Sdh1+Sdh2+Sdh3+Sdh4                                    | $[fumarate]/[succinate]$                     |
| FUM   | Fum1                                                   | $[malate]/[fumarate]$                        |
| MAE   | Mae1+Pyk1/Pyk2                                         | $[malate]/[PEP]$                             |
| ICL   | Icl1/Icl2                                              | $[succinate]/[isocitrate]$                   |
| OxPPP | Zwf1+Sol3/Sol4                                         | $[6PG]/[G6P]$                                |
| GND   | Gnd1/Gnd2                                              | $[Ru5P+Xu5P]/[6PG]$                          |
| RKI   | Rki1                                                   | $[R5P]/[Ru5P+Xu5P]$                          |
| TKLa  | Tkl1/Tkl2+Tpi1                                         | $[DHAP]*[S7P]/[Ru5P+Xu5P]*[R5P]$             |
| TKLb  | Tkl1/Tkl2+Tpi1                                         | $[DHAP]*[F6P+G1P]/[Ru5P+Xu5P]*[E4P]$         |
| TAL   | Tal1/Nqm1+Tpi1                                         | $[DHAP]*[S7P]/[E4P]*[F6P+G1P]$               |
| GDH   | Gdh1/Gdh2/Gdh3                                         | $[glutamate]/[\alpha\text{-ketoglutarate}]$  |
| GLN   | Gln1                                                   | $[glutamine]/[glutamate]$                    |

**Table S5 - Adenylate energy charge**

Adenylate energy charge (Atkinson et al.) of the 33 deletion strains on three different substrates, calculated as  
 $AEC = ([ATP] + 0.5 * [ADP]) / ([ATP] + [ADP] + [AMP])$

| adenylate energy charge (AEC) |         |        |           |        |         |        |
|-------------------------------|---------|--------|-----------|--------|---------|--------|
| mutant                        | glucose |        | galactose |        | ethanol |        |
|                               | average | s.d.   | average   | s.d.   | average | s.d.   |
| WT                            | 0.91    | ± 0.01 | 0.89      | ± 0.02 | 0.76    | ± 0.10 |
| ADH1                          | 0.81    | ± 0.10 | 0.86      | ± 0.00 | 0.80    | ± 0.03 |
| ADH3                          | 0.91    | ± 0.01 | 0.88      | ± 0.02 | 0.82    | ± 0.01 |
| ALD5                          | 0.89    | ± 0.02 | 0.87      | ± 0.03 | 0.82    | ± 0.05 |
| ALD6                          | 0.90    | ± 0.02 | 0.89      | ± 0.00 | 0.83    | ± 0.04 |
| COX5a                         | 0.87    | ± 0.09 |           |        |         |        |
| CTP1                          | 0.90    | ± 0.02 | 0.88      | ± 0.02 | 0.77    | ± 0.09 |
| DAL7                          | 0.90    | ± 0.02 | 0.89      | ± 0.02 | 0.81    | ± 0.06 |
| FUM1                          | 0.92    | ± 0.03 |           |        |         |        |
| GCV2                          | 0.91    | ± 0.03 | 0.88      | ± 0.01 | 0.88    | ± 0.01 |
| GLY1                          | 0.90    | ± 0.01 | 0.88      | ± 0.02 | 0.84    | ± 0.04 |
| GND2                          | 0.89    | ± 0.03 | 0.88      | ± 0.02 | 0.80    | ± 0.04 |
| ICL1                          | 0.91    | ± 0.03 | 0.89      | ± 0.02 | 0.89    | ± 0.02 |
| IDP1                          | 0.89    | ± 0.01 | 0.89      | ± 0.02 | 0.84    | ± 0.04 |
| IDP2                          | 0.89    | ± 0.02 | 0.89      | ± 0.02 | 0.80    | ± 0.03 |
| LSC1                          | 0.89    | ± 0.03 | 0.89      | ± 0.02 | 0.83    | ± 0.03 |
| MAE1                          | 0.90    | ± 0.01 | 0.90      | ± 0.01 | 0.80    | ± 0.02 |
| MDH1                          | 0.91    | ± 0.01 | 0.87      | ± 0.03 | 0.87    | ± 0.03 |
| MDH2                          | 0.89    | ± 0.04 | 0.87      | ± 0.02 | 0.87    | ± 0.02 |
| MDH3                          | 0.89    | ± 0.03 | 0.89      | ± 0.01 | 0.82    | ± 0.01 |
| MLS1                          | 0.93    | ± 0.03 | 0.85      | ± 0.02 | 0.85    | ± 0.02 |
| NQM1                          | 0.91    | ± 0.01 | 0.88      | ± 0.03 | 0.77    | ± 0.08 |
| OAC1                          | 0.90    | ± 0.02 | 0.88      | ± 0.01 | 0.77    | ± 0.06 |
| PCK1                          | 0.92    | ± 0.01 | 0.90      | ± 0.01 | 0.90    | ± 0.01 |
| PGM1                          | 0.91    | ± 0.02 |           |        | 0.79    | ± 0.06 |
| PGM2                          | 0.89    | ± 0.03 | 0.88      | ± 0.03 | 0.78    | ± 0.06 |
| SDH1                          | 0.89    | ± 0.03 |           |        |         |        |
| SER33                         | 0.90    | ± 0.03 | 0.88      | ± 0.02 | 0.84    | ± 0.01 |
| SFC1                          | 0.90    | ± 0.00 | 0.90      | ± 0.01 | 0.90    | ± 0.01 |
| SOL1                          | 0.90    | ± 0.02 | 0.89      | ± 0.01 | 0.82    | ± 0.03 |
| SOL2                          | 0.91    | ± 0.02 | 0.87      | ± 0.04 | 0.82    | ± 0.06 |
| SOL3                          | 0.94    | ± 0.01 | 0.88      | ± 0.01 | 0.76    | ± 0.07 |
| SOL4                          | 0.89    | ± 0.01 | 0.88      | ± 0.04 | 0.82    | ± 0.05 |
| TAL1                          | 0.90    | ± 0.03 | 0.88      | ± 0.01 | 0.82    | ± 0.05 |

Reference:

Atkinson, D. E. Energy charge of the adenylate pool as a regulatory parameter. Interaction with feedback modifiers. *Biochemistry* **7**, 4030-4034 (1968).

**Table S6 – Growth and metabolic phenotype for isoenzyme knockouts.**

Growth phenotypes are based on the measured growth rates reported in Supplementary Table 3. Metabolic phenotypes were evaluated from metabolome measurements (Supplementary Data). ND, known isoenzymes that were not included in this study. \*, mitochondrial.

|                                         | glucose       |               | galactose     |              | ethanol       |           |
|-----------------------------------------|---------------|---------------|---------------|--------------|---------------|-----------|
|                                         | growth        | metabolic     | growth        | metabolic    | growth        | metabolic |
| <b>Alcohol dehydrogenase</b>            |               |               |               |              |               |           |
| <i>ADH1</i>                             | <b>-50%</b>   | <b>global</b> | silent        | <b>local</b> | silent        | silent    |
| <i>ADH3*</i>                            | silent        | silent        | silent        | silent       | silent        | silent    |
| <i>ADH2,4,5,6</i>                       | ND            |               |               |              |               |           |
| <b>Aldehyde dehydrogenase</b>           |               |               |               |              |               |           |
| <i>ALD5*</i>                            | silent        | silent        | silent        | silent       | silent        | silent    |
| <i>ALD6</i>                             | <b>-20%</b>   | <b>local</b>  | silent        | silent       | <b>-35%</b>   | silent    |
| <i>ALD1-4*</i>                          | ND            |               |               |              |               |           |
| <b>6-phosphogluconate dehydrogenase</b> |               |               |               |              |               |           |
| <i>GND1</i>                             | <b>lethal</b> | -             | <b>lethal</b> | -            | <b>lethal</b> | -         |
| <i>GND2</i>                             | silent        | silent        | silent        | silent       | silent        | silent    |
| <b>Malate synthase</b>                  |               |               |               |              |               |           |
| <i>DAL7</i>                             | silent        | silent        | silent        | silent       | silent        | silent    |
| <i>MLS1</i>                             | silent        | silent        | silent        | <b>local</b> | <b>lethal</b> |           |
| <b>Isocitrate dehydrogenase</b>         |               |               |               |              |               |           |
| <i>IDP1*</i>                            | silent        | silent        | silent        | <b>local</b> | silent        | silent    |
| <i>IDP2</i>                             | silent        | silent        | silent        | silent       | <b>-20%</b>   | silent    |
| <i>IDP3</i>                             | ND            |               |               |              |               |           |
| <b>Malate dehydrogenase</b>             |               |               |               |              |               |           |
| <i>MDH1*</i>                            | <b>-15%</b>   | <b>local</b>  | silent        | <b>local</b> | <b>lethal</b> | -         |
| <i>MDH2</i>                             | silent        | silent        | silent        | silent       | <b>lethal</b> | -         |
| <i>MDH3</i>                             | silent        | silent        | silent        | silent       | <b>-15%</b>   | silent    |
| <b>Transaldolase</b>                    |               |               |               |              |               |           |
| <i>TAL1</i>                             | <b>-15%</b>   | <b>local</b>  | silent        | silent       | silent        | silent    |
| <i>NQM1</i>                             | silent        | silent        | silent        | silent       | silent        | silent    |
| <b>Phosphogluco mutase</b>              |               |               |               |              |               |           |
| <i>PGM1</i>                             | <b>-15%</b>   | <b>local</b>  | lethal        | -            | silent        | silent    |
| <i>PGM2</i>                             | silent        | silent        | <b>-70%</b>   | <b>local</b> | silent        | silent    |
| <b>6-phosphoglucono lactonase</b>       |               |               |               |              |               |           |
| <i>SOL1</i>                             | silent        | silent        | silent        | silent       | silent        | silent    |
| <i>SOL2</i>                             | silent        | silent        | silent        | silent       | silent        | silent    |
| <i>SOL3</i>                             | <b>-35%</b>   | <b>local</b>  | silent        | <b>local</b> | silent        | silent    |
| <i>SOL4</i>                             | silent        | silent        | silent        | silent       | silent        | silent    |



**Figure S2 – Correlation analysis between growth rate and metabolome.**

(A) Relative metabolite concentrations of healthy (solid symbols) and sick (open symbols) mutants on glucose (red), galactose (green), and ethanol (blue). All mutants with a reduction in growth of 30% or more were flagged as sick. For each metabolite and substrate, the concentrations in the mutants were normalized to that of the wild-type. In the case of glucose, only 1,3-BiP-Glycerate (BPG, marked with \*) was found to be different (two-tailed t-test,  $p < 10^{-4}$ ). The number of sick individuals on galactose and ethanol does not allow statistical testing.

(B) Mutual information content calculated between all metabolites and the relative growth rate (normalized to that of the wild-type, cfr. Supplementary Table 2). The value was calculated according to Peng et al. either individually for the three substrates ( $n = 34$ ,  $30$ , and  $24$ ) or for cases simultaneously ( $n = 88$ ). Note that to emphasize differences between generally very low scores, the color scaling covers only the bottom 10% of the possible range (maximum = 1). The highest value was found for glutamate in the glucose case and equals 0.09 (Pearson correlation coefficient = -0.08). Overall, we conclude that no relevant correlation exists between any of the measured metabolites and growth rate.

**Reference:**

Peng, H., Long, F. & Ding, C. Feature selection based on mutual information: criteria of max-dependency, max-relevance, and min-redundancy. *IEEE Transactions on Pattern Analysis and Machine Intelligence* **27**, 1226-1238 (2005).

**A) relative metabolite concentrations  
of healthy vs. sick mutants**

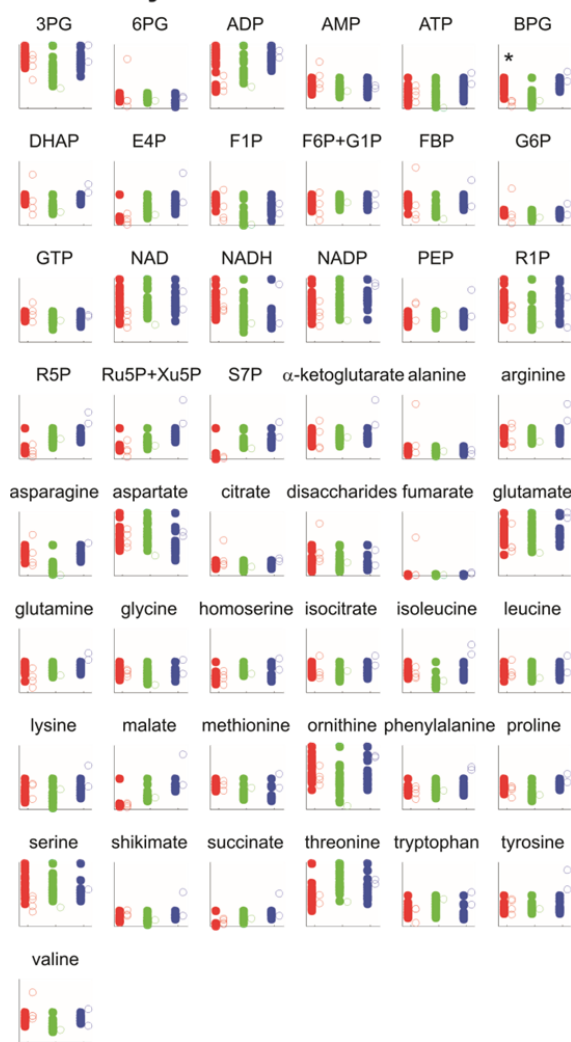

**B) normalized mutual information**

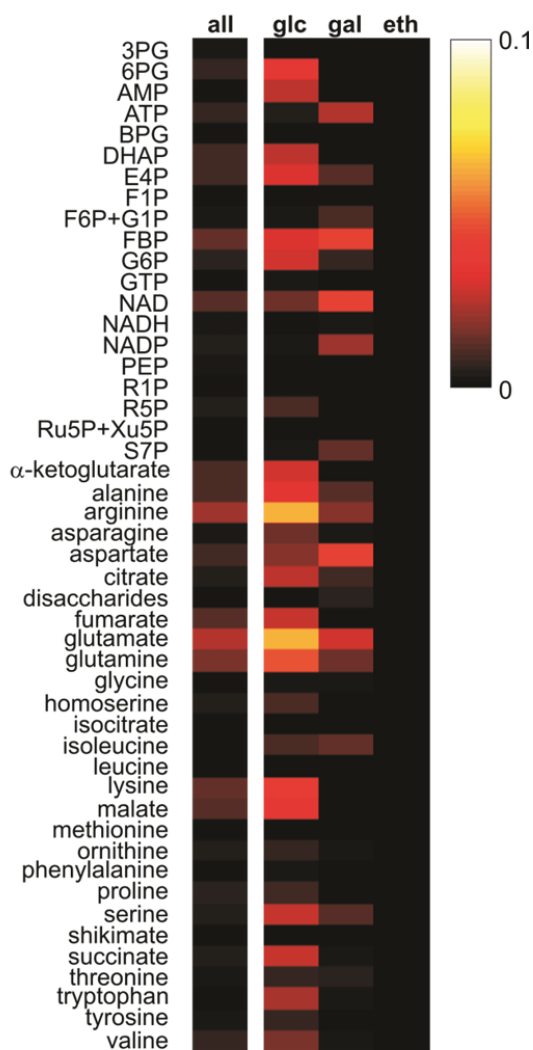

**Figure S3 – Correlation between metabolite concentrations and metabolic fluxes.**

With a dataset of 33 mutants growing on glucose, Pearson correlation coefficients were calculated between the average metabolite pools measured in this study and the metabolic fluxes determined experimentally by <sup>13</sup>C-tracer experiments (Blank et al.). For graphic purposes, metabolites and fluxes were clustered using Euclidean distance.

The largest correlation (~ 0.5) could be found between fumarate and the C4-moiety of the tricarboxylic acid cycle. Most correlations are in the range of -0.3 – +0.3, thus pointing to a generally poor relationship between metabolites and fluxes.

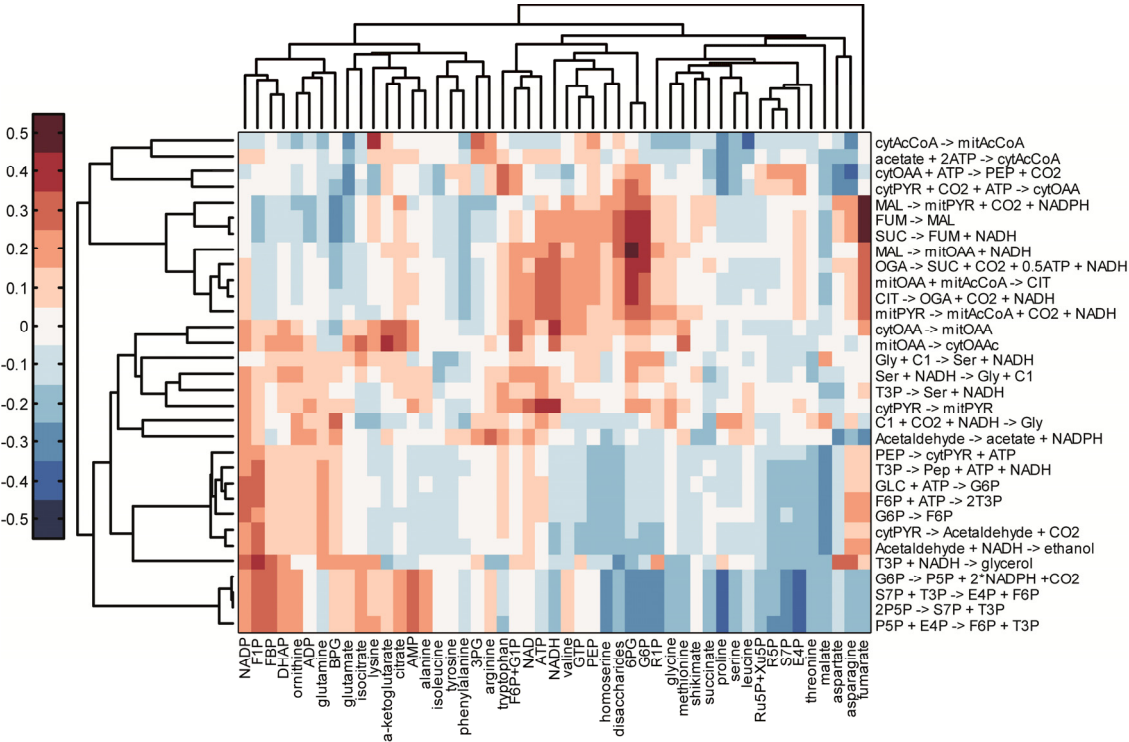

**References:**

Blank, L.M., Küpfer, L. & Sauer, U. Large-scale <sup>13</sup>C-flux analysis reveals mechanistic principles of metabolic network robustness to null mutations in yeast. *Genome Biol* 6, R49 (2005).

**Figure S4 – Multivariate analysis of metabolome data**

To rank the effects of environment and mutations on the metabolome, we performed a principal component analysis with the average metabolite concentrations measured in at least four biological replicates during exponential grow on minimal medium with either glucose (red), galactose (green), or ethanol (blue). To compensate for the heterogeneous abundance of metabolites in vivo, all concentrations of each compound were first standardized to mean 0 and variance 1. The initial two principal components account for 95% of the total variance and fully discriminate between substrates, whilst the different mutants on one substrate cluster together (A). The corresponding coefficients are shown in (B). The dominating role of the substrate is independently confirmed by hierarchical clustering (C) after standardization of concentrations.

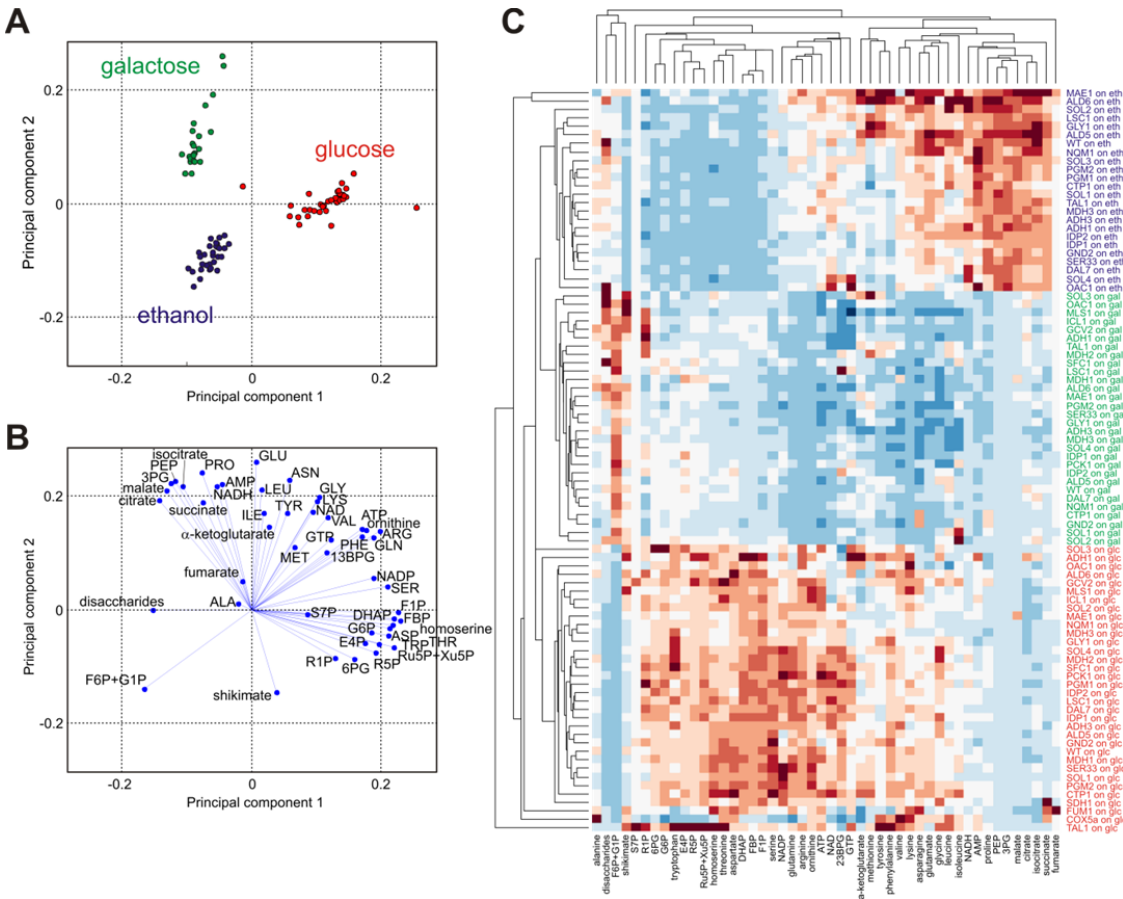

**Figure S5 – Analysis of changes in chemical equilibrium in enzymatic mutants.**

For the list of reactions involved in central carbon metabolism (see Supplementary Table 4 for details), we calculated the change in mass action (MA) ratios compared to the reference state of the wild type. Down-regulation of an enzyme is expected to produce an accumulation of its substrates and, thus, a decrease in mass action ratio and a blue color in the plot. The color scaling was changed to emphasize small changes. The largest fold-change is -8.7 (log2) for the FUM reaction in the *FUM1* deletion on glucose. In general, the strongest effects on the metabolome are observed immediately upstream the delete enzyme. Only in the case of growth-deficient strains (marked with an asterisk \*), distributed effects can be seen. On galactose, the apparently high scores of *MLS1*, *NQM1*, and *ICL1* mutants for the reactions TDH, PGK, TKLa, TAL are caused by the noisy measurement of glyceraldehyde-3-phosphate.

(figure on next page)

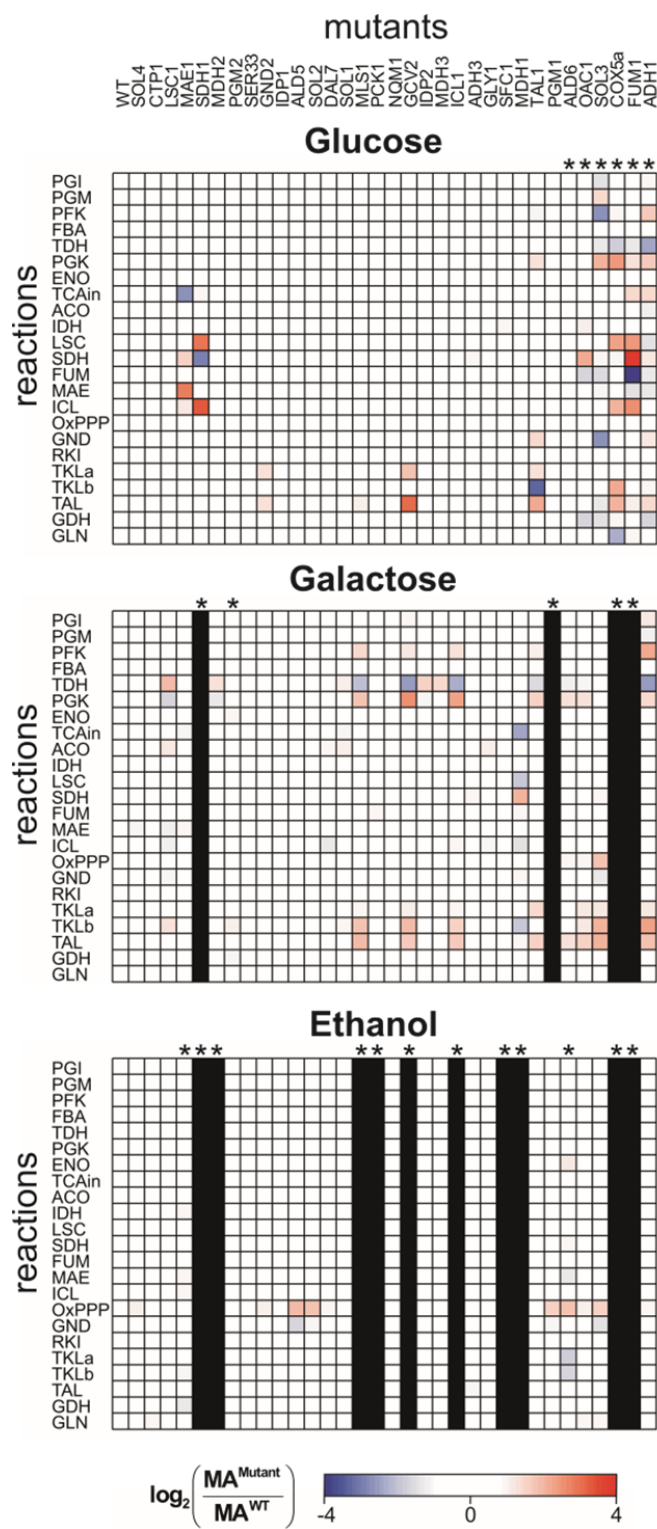

**Figure S6: Metabolome response to pentose-phosphate pathway transaldolase deletion**

The bars represent relative metabolite concentrations. Absolute quantities can be found in the Supplementary data. Error bars indicate standard deviations calculated from at least four biological replicates. For abbreviations of metabolites refer to Table S2.

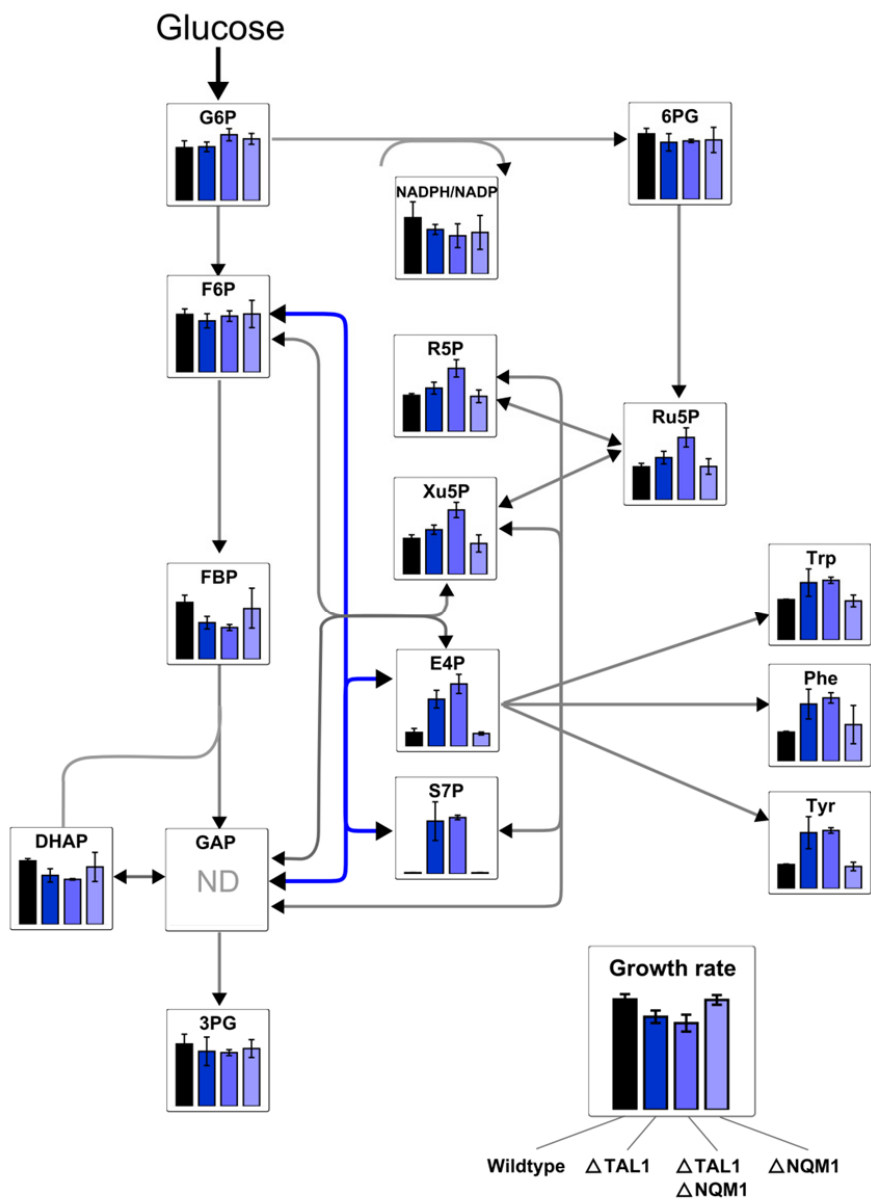

Supplement: c2mb25423a.pdf [file c2mb25423a.pdf]
